# Supplementary material for: Cell proliferation within small intestinal crypts is the principal driving force for cell migration on villi
Source: PubMed Central journal article supplement (PMC5241155; doi:10.1096/fj.201601002), 2016-10-20
Supplement: supp_fj.201601002_Supplemental_Table1.pdf [file supp_fj.201601002_Supplemental_Table1.pdf]

Supplementary Table 1. Model parameters description, estimates and standard error

| Parameter (units)           | Equation | Description                                                                                | Control         |                  | Omomyc           |                  | <sup>3</sup> Within [0-10h] post-AraC |                                | <sup>4</sup> Beyond 10h post-AraC |                  |
|-----------------------------|----------|--------------------------------------------------------------------------------------------|-----------------|------------------|------------------|------------------|---------------------------------------|--------------------------------|-----------------------------------|------------------|
|                             |          |                                                                                            | Duodenum        | Ileum            | Duodenum         | Ileum            | Duodenum                              | Ileum                          | Duodenum                          | Ileum            |
| $t_0$ (h)                   | S3       | Initial time (h)                                                                           | <sup>1</sup> 0  | <sup>1</sup> 0   | <sup>1</sup> 0   | <sup>1</sup> 0   | <sup>1</sup> 15                       | <sup>1</sup> 15                | <sup>1</sup> 25                   | <sup>1</sup> 25  |
| $L_{C0}$ (num cells)        | S3       | Number of labelled cells in the crypt at $t_0$                                             | 7.32 ± 1.30     | 7.64 ± 0.947     | 4.77 ± 0.763     | 3.09 ± 0.338     | 11.6 ± 1.29                           | 9.58 ± 0.302                   | 10.71 ± 1.037                     | 9.25 ± 0.669     |
| $L_{V0}$ (num cells)        | S3       | Number of labelled cells on the villus at $t_0$                                            | <sup>1</sup> 0  | <sup>1</sup> 0   | <sup>1</sup> 0   | <sup>1</sup> 0   | 3.58 ± 0.81                           | 6.35 ± 1.36                    | 5.60 ± 1.12                       | 6.80 ± 0.689     |
| $\delta$ (h <sup>-1</sup> ) | S3       | Crypt specific cell proliferation rate or specific cell transfer rate from crypt to villus | 0.0760 ± 0.0147 | 0.0544 ± 0.00644 | 0.0547 ± 0.00665 | 0.0509 ± 0.00427 | <sup>2</sup> 0.00891 ± 0.0128         | <sup>2</sup> 0.00136 ± 0.00698 | 0.0864 ± 0.0144                   | 0.0466 ± 0.00901 |
| $t_l$ (h)                   | S3       | Starting time of labelled cell migration from crypt to villus                              | 6.00 ± 1.52     | 7.08 ± 2.25      | 14.0 ± 1.43      | 18.6 ± 0.476     | <sup>1</sup> 15                       | <sup>1</sup> 15                | <sup>1</sup> 25                   | <sup>1</sup> 25  |
| $V_{LF}$ (µm/h)             | S6       | Velocity of labelled front on villus                                                       | 9.00 ± 0.465    | 5.96 ± 0.379     | 7.24 ± 0.190     | 5.29 ± 0.235     | <sup>2</sup> -0.798 ± 0.942           | <sup>2</sup> 0.0765 ± 0.477    | 8.68 ± 0.655                      | 6.09 ± 1.15      |
| $K$ (µm)                    | S6       | Arbitrary constant                                                                         | 3.28 ± 9.86     | 86.3 ± 7.54      | -25.3 ± 7.21     | 8.41 ± 8.04      | 193 ± 17.6                            | 179 ± 9.83                     | -66.7 ± 27.2                      | 19.9 ± 44.0      |

<sup>1</sup> Fixed value.<sup>2</sup> Not significantly different from 0

Time 0 set to time of label activation (2h post-label injection)
